# Supplementary material for: NF-kB2 Genetic Variations are Significantly Associated with Non-Small Cell Lung Cancer Risk and Overall Survival
Source: PubMed Central journal article supplement (PMC5869671; doi:10.1038/s41598-018-23324-3), 2018-03-27
Supplement: 41598_2018_23324_MOESM1_ESM.pdf [file 41598_2018_23324_MOESM1_ESM.pdf]

# NF- $\kappa$ B2 GENETIC VARIATIONS ARE SIGNIFICANTLY ASSOCIATED WITH NON-SMALL CELL LUNG CANCER

## RISK AND OVERALL SURVIVAL

<sup>1</sup>Foteinos-Ioannis D. Dimitrakopoulos, <sup>1</sup>Anna G. Antonacopoulou, <sup>1</sup>Anastasia E. Kottorou, <sup>2</sup>Stella Maroussi, <sup>3</sup>Nikolaos Panagopoulos, <sup>1</sup>Ioulia Koukourikou, <sup>4</sup>Chrisoula Scopa, <sup>5</sup>Melpomeni Kalofonou, <sup>1</sup>Angelos Koutras, <sup>1</sup>Thomas Makatsoris, <sup>6</sup>Helen Papadaki, <sup>3</sup>Dimitrios Dougenis, <sup>7</sup>Malcolm Brock, <sup>1\*</sup>Haralabos P. Kalofonos

<sup>1</sup>Molecular Oncology Laboratory, Division of Oncology, Department of Internal Medicine, Medical School, University of Patras, Patras, Greece

<sup>2</sup> "G. Gennimatas" General Hospital of Athens, Neurology Department, Athens, Greece

<sup>3</sup>Department of Cardiothoracic Surgery, Medical School, University of Patras, Patras, Greece

<sup>4</sup>Department of Pathology, Medical School, University of Patras, Patras, Greece

<sup>5</sup>Institute of Biomedical Engineering, Imperial College London, London, United Kingdom

<sup>6</sup>Department of Anatomy, Medical School, University of Patras, Patras, Greece

<sup>7</sup>Division of Thoracic Surgery, Department of Surgery, Johns Hopkins University School of Medicine, Baltimore, MD, USA

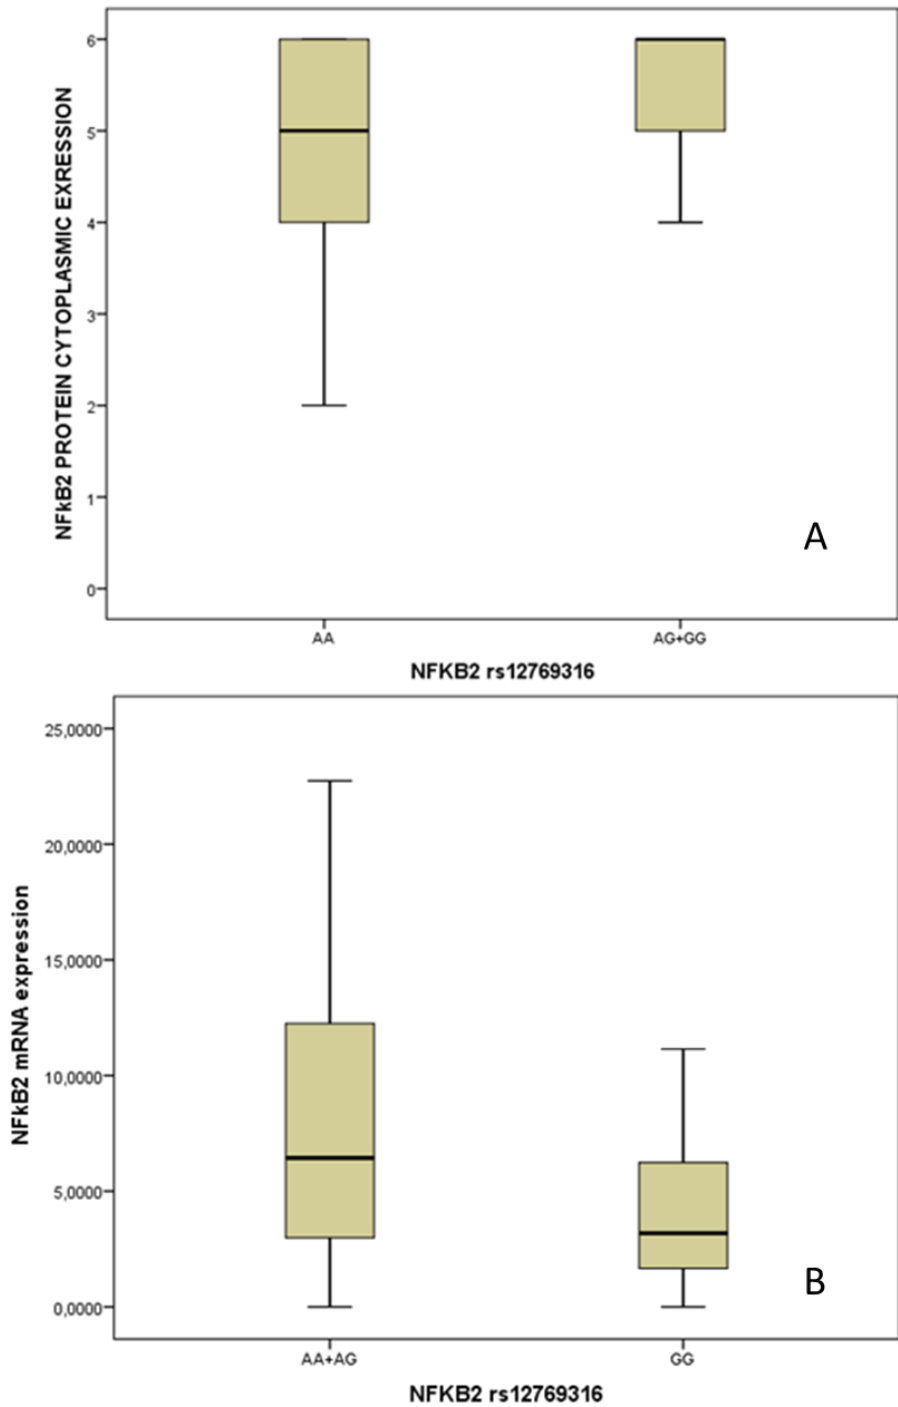

**Supplementary Figure 1.** NF-kB2 expression related to rs12769316 dominant model (AA vs AG+GG) in protein (A) and mRNA (B) level.

| Clinicopathological characteristics | Patients<br>n (%) | Genotypes      |                | P-value |
|-------------------------------------|-------------------|----------------|----------------|---------|
|                                     |                   | TT             | GG+GT          |         |
| <b>Total</b>                        | 272 (100)         |                |                |         |
| Genotyped                           | 264 (97.1)        | 145 (53.3)     | 119 (43.8)     | -       |
| NA                                  | 8 (2.9)           | -              | -              |         |
| <b>Age (years) Mean (range)</b>     | 65 (40-84)        |                |                |         |
| Genotyped                           | 264 (100)         |                |                |         |
| <65                                 | 102 (38.6)        | 56 (21.2)      | 46 (17.4)      | 0.969   |
| >=65                                | 161 (61.0)        | 88 (33.3)      | 73 (27.7)      |         |
| NA                                  | 1 (0.4)           | 1 (0.4)        | 0 (0.0)        |         |
| <b>Gender</b>                       |                   |                |                |         |
| Genotyped                           | 264 (100)         |                |                |         |
| Male                                | 242 (91.7)        | 135 (51.1)     | 107 (40.5)     | 0.351   |
| Female                              | 22 (8.3)          | 10 (3.8)       | 12 (4.5)       |         |
| <b>Smoking (pack-years)</b>         |                   |                |                |         |
| Genotyped                           | 264               |                |                |         |
| Cases                               | 108 (41.0)        | 57 (21.6)      | 51 (19.4)      | 0.545   |
| Mean (range)                        | 86.30 (10-200)    | 83.93 (10-200) | 88.94 (20-165) |         |
| NA                                  | 156 (59.1)        | 88 (56.4)      | 68 (25.8)      |         |
| <b>Primary location</b>             |                   |                |                |         |
| Genotyped                           | 264 (100)         |                |                |         |
| Left lung                           | 116 (44.0)        | 65 (19.3)      | 51 (19.3)      | 0.575   |
| Right lung                          | 139 (52.6)        | 73 (27.7)      | 66 (25.0)      |         |
| NA                                  | 9 (3.4)           | 7 (2.7)        | 2 (0.7)        |         |
| <b>Histology</b>                    |                   |                |                |         |
| Genotyped                           | 264 (100)         |                |                |         |
| Squamous                            | 128 (48.5)        | 78 (29.5)      | 50 (19.0)      | 0.116   |
| Adenocarcinoma                      | 113 (42.8)        | 54 (20.5)      | 59 (22.3)      |         |
| Large carcinoma                     | 14 (5.3)          | 7 (2.7)        | 7 (2.7)        |         |
| NA                                  | 9 (2.4)           | 6 (2.3)        | 3 (1.1)        |         |

|                                |                   |                   |                   |       |
|--------------------------------|-------------------|-------------------|-------------------|-------|
| <b>Stage</b>                   |                   |                   |                   |       |
| Genotyped                      | 264 (100)         |                   |                   |       |
| I                              | 75 (28.4)         | 44 (16.7)         | 31 (11.7)         |       |
| II                             | 63 (23.9)         | 30 (11.4)         | 33 (12.5)         |       |
| III                            | 75 (28.4)         | 43 (16.3)         | 32 (12.1)         | 0.519 |
| IV                             | 38 (14.4)         | 19 (7.2)          | 19 (7.2)          |       |
| NA                             | 13 (4.9)          | 9 (2.4)           | 4 (1.5)           |       |
| <b>Grade</b>                   |                   |                   |                   |       |
| Genotyped                      | 264 (100)         |                   |                   |       |
| I                              | 7 (2.7)           | 6 (2.3)           | 1 (0.4)           |       |
| II                             | 102 (38.6)        | 54 (20.5)         | 48 (18.1)         | 0.241 |
| III                            | 104 (39.4)        | 57 (21.6)         | 47 (17.8)         |       |
| NA                             | 51 (19.3)         | 28 (10.6)         | 23 (8.7)          |       |
| <b>Maximum diameter (cm)</b>   |                   |                   |                   |       |
| Genotyped                      | 264 (100)         |                   |                   |       |
| Cases (%)                      | 219 (83.0)        | 117 (44.3)        | 102 (38.6)        | 0.425 |
| Mean (range)                   | 4.84 (0.70-21.00) | 4.88 (0.70-18.00) | 4.88 (1.00-21.00) |       |
| NA                             | 45 (17.0)         | 28 (10.6)         | 17 (6.4)          |       |
| <b>Lymph node infiltration</b> |                   |                   |                   |       |
| Genotyped                      | 264 (100)         |                   |                   |       |
| No                             | 109 (41.30)       | 59 (22.3)         | 50 (19.0)         | 0.838 |
| Yes                            | 93 (35.2)         | 49 (18.6)         | 44 (16.6)         |       |
| NA                             | 62 (23.50)        | 37 (14.0)         | 25 (9.5)          |       |
| <b>Metastasis (adrenals)</b>   |                   |                   |                   |       |
| Genotyped                      | 264 (100)         |                   |                   |       |
| No                             | 45 (17.0)         | 26 (9.8)          | 19 (7.20)         | 0.872 |
| Yes                            | 18 (6.8)          | 10 (3.8)          | 8 (3.0)           |       |
| NA                             | 201 (76.1)        | 109 (41.3)        | 92 (34.8))        |       |
| <b>Metastasis (liver)</b>      |                   |                   |                   |       |
| Genotyped                      | 264 (100)         |                   |                   |       |
| No                             | 43 (16.3)         | 25 (9.5)          | 18 (6.8)          | 0.899 |
| Yes                            | 23 (8.7)          | 13 (4.9)          | 10 (3.8)          |       |
| NA                             | 198 (75.0)        | 102 (38.6)        | 91 (34.5)         |       |

|                                               |            |            |            |              |
|-----------------------------------------------|------------|------------|------------|--------------|
| <b>Metastasis (brain)</b>                     |            |            |            |              |
| Genotyped                                     | 264 (100)  |            |            |              |
| No                                            | 43 (16.3)  | 24 (9.1)   | 19 (7.2)   | 0.210        |
| Yes                                           | 36 (13.6)  | 15 (5.7)   | 21 (8.0)   |              |
| NA                                            | 185 (70.0) | 106 (40.2) | 79 (29.9)  |              |
| <b>Metastasis (bone)</b>                      |            |            |            |              |
| Genotyped                                     | 264 (100)  |            |            |              |
| No                                            | 38 (14.4)  | 21 (8.0)   | 17 (6.4)   | 0.794        |
| Yes                                           | 43 (16.3)  | 25 (9.5)   | 18 (6.8)   |              |
| NA                                            | 183 (69.3) | 99 (37.5)  | 84 (31.8)  |              |
| <b>Metastasis (adrenals-liver-brain-bone)</b> |            |            |            |              |
| Genotyped                                     | 264 (100)  |            |            |              |
| No                                            | 16 (6.1)   | 10 (3.8)   | 6 (2.3)    | 0.406        |
| Yes                                           | 84 (31.8)  | 43 (16.3)  | 41 (15.5)  |              |
| NA                                            | 164 (62.1) | 129 (48.9) | 35 (13.2)  |              |
| <b>Survival (2 years)</b>                     |            |            |            |              |
| Genotyped                                     | 264 (100)  |            |            |              |
| Dead                                          | 115 (43.5) | 75 (28.4)  | 40 (15.2)  | <b>0.012</b> |
| Alive                                         | 142 (53.8) | 69 (26.1)  | 73 (27.7)  |              |
| NA                                            | 7 (2.7)    | 1 (0.4)    | 6 (2.3)    |              |
| <b>Survival (3 years)</b>                     |            |            |            |              |
| Genotyped                                     | 264 (100)  |            |            |              |
| Dead                                          | 147 (55.7) | 91 (34.5)  | 56 (21.2)  | <b>0.033</b> |
| Alive                                         | 107 (40.5) | 53 (20.0)  | 54 (20.5)  |              |
| NA                                            | 10 (3.8)   | 1 (0.4)    | 9 (3.4)    |              |
| <b>Survival (5 years)</b>                     |            |            |            |              |
| Genotyped                                     | 264 (100)  |            |            |              |
| Dead                                          | 174 (65.9) | 104 (39.4) | 70 (2.7)   | 0.062        |
| Alive                                         | 80 (30.3)  | 40 (15.15) | 40 (15.15) |              |
| NA                                            | 10 (3.8)   | 1 (0.4)    | 9 (3.4)    |              |

**Supplementary Table S1.** Relationships between clinicopathological variables and *NF-kB2* rs7897947 genotypes. Abbreviations: NA, data not available or unknown.

| Clinicopathological characteristics | Patients<br>n (%) | Genotypes      |                | P-value |
|-------------------------------------|-------------------|----------------|----------------|---------|
|                                     |                   | GG             | AA+AG          |         |
| <b>Total</b>                        | 272 (100)         |                |                |         |
| Genotyped                           | 242 (89.0)        | 160 (58.8)     | 82 (30.2)      | -       |
| NA                                  | 30 (11.0)         | -              | -              |         |
| <b>Age (years) Mean (range)</b>     | 65 (40-84)        |                |                |         |
| Genotyped                           | 242 (100)         |                |                |         |
| <65                                 | 93 (38.4)         | 58 (24.0)      | 35 (14.4)      | 0.348   |
| >=65                                | 148 (61.2)        | 101 (41.8)     | 47 (19.4)      |         |
| NA                                  | 1 (0.4)           |                |                |         |
| <b>Gender</b>                       |                   |                |                |         |
| Genotyped                           | 242 (100)         |                |                |         |
| Male                                | 220 (90.9)        | 144 (59.5)     | 76 (31.4)      | 0.492   |
| Female                              | 22 (9.1)          | 16 (6.6)       | 6 (2.5)        |         |
| <b>Smoking (pack-years)</b>         |                   |                |                |         |
| Genotyped                           | 242 (100)         |                |                |         |
| Cases                               | 98 (40.5)         | 62 (25.6)      | 36 (14.9)      | 0.350   |
| Mean (range)                        | 86.30 (10-200)    | 87.02 (10-165) | 85.89 (20-200) |         |
| NA                                  | 144 (59.5)        | 98 (40.5)      | 46 (19.0)      |         |
| <b>Primary location</b>             |                   |                |                |         |
| Genotyped                           | 242 (100)         |                |                |         |
| Left lung                           | 103 (42.7)        | 68 (28.1)      | 35 (14.5)      | 0.151   |
| Right lung                          | 131 (54.1)        | 86 (35.5)      | 45 (18.6)      |         |
| NA                                  | 8 (3.3)           | 6 (2.5)        | 2 (0.8)        |         |
| <b>Histology</b>                    |                   |                |                |         |
| Genotyped                           | 242 (100)         |                |                |         |
| Squamous                            | 116 (47.9)        | 73 (30.2)      | 43 (17.8)      | 0.430   |
| Adenocarcinoma                      | 107 (44.2)        | 73 (30.2)      | 34 (14.0)      |         |
| Large carcinoma                     | 10 (4.2)          | 5 (2.1)        | 5 (2.1)        |         |
| NA                                  | 9 (3.7)           | 9 (3.7)        | -              |         |

|                                |                   |                   |                   |              |
|--------------------------------|-------------------|-------------------|-------------------|--------------|
| <b>Stage</b>                   |                   |                   |                   |              |
| Genotyped                      | 242 (100)         |                   |                   |              |
| I                              | 67 (27.7)         | 45 (18.6)         | 22 (9.1)          | <b>0.037</b> |
| II                             | 52 (21.5)         | 31 (12.8)         | 21 (8.7)          |              |
| III                            | 71 (29.3)         | 42 (17.4)         | 29 (11.9)         |              |
| IV                             | 39 (16.1)         | 33 (13.6)         | 6 (2.5)           |              |
| NA                             | 13 (5.4)          | 9 (3.7)           | 4 (1.7)           |              |
| <b>Grade</b>                   |                   |                   |                   |              |
| Genotyped                      | 242 (100)         |                   |                   |              |
| I                              | 7 (2.9)           | 4 (1.7)           | 3 (1.2)           | 0.362        |
| II                             | 92 (38.0)         | 64 (26.4)         | 28 (11.6)         |              |
| III                            | 95 (39.3)         | 57 (23.6)         | 38 (15.7)         |              |
| NA                             | 48 (19.8)         | 35 (14.4)         | 13 (5.4)          |              |
| <b>Maximum diameter (cm)</b>   |                   |                   |                   |              |
| Genotyped                      | 242 (100)         |                   |                   |              |
| Cases (%)                      | 198 (81.8)        | 125 (51.7)        | 73 (30.1)         | <b>0.031</b> |
| Mean (range)                   | 4.72 (0.70-14.00) | 4.44 (0.70-11.00) | 5.20 (1.00-14.00) |              |
| NA                             | 44 (18.2)         | 35 (14.5)         | 9 (3.7)           |              |
| <b>Lymph node infiltration</b> |                   |                   |                   |              |
| Genotyped                      | 242 (100)         |                   |                   |              |
| No                             | 98 (40.5)         | 58 (24.0)         | 40 (16.5)         | 0.358        |
| Yes                            | 82 (33.9)         | 54 (22.3)         | 28 (11.6)         |              |
| NA                             | 62 (25.6)         | 48 (19.8)         | 14 (5.8)          |              |
| <b>Metastasis (adrenals)</b>   |                   |                   |                   |              |
| Genotyped                      | 242 (100)         |                   |                   |              |
| No                             | 40 (16.5)         | 24 (9.9)          | 16 (6.6)          | 0.448        |
| Yes                            | 17 (7.0)          | 12 (5.0)          | 5 (2.1)           |              |
| NA                             | 185 (76.4)        | 120 (49.6)        | 65 (26.9)         |              |
| <b>Metastasis (liver)</b>      |                   |                   |                   |              |
| Genotyped                      | 242 (100)         |                   |                   |              |
| No                             | 39 (16.1)         | 21 (8.7)          | 18 (7.4)          | 0.223        |
| Yes                            | 23 (9.5)          | 16 (6.6)          | 7 (2.9)           |              |
| NA                             | 180 (74.4)        | 123 (50.1)        | 57 (23.6)         |              |

|                                               |            |            |           |       |
|-----------------------------------------------|------------|------------|-----------|-------|
| <b>Metastasis (brain)</b>                     |            |            |           |       |
| Genotyped                                     | 242 (100)  |            |           |       |
| No                                            | 38 (15.7)  | 23 (9.5)   | 15 (6.2)  | 0.327 |
| Yes                                           | 35 (14.5)  | 25 (10.3)  | 10 (4.1)  |       |
| NA                                            | 169 (69.8) | 112 (46.3) | 57 (23.6) |       |
| <b>Metastasis (bone)</b>                      |            |            |           |       |
| Genotyped                                     | 242 (100)  |            |           |       |
| No                                            | 34 (14.0)  | 20 (8.3)   | 14 (5.8)  | 0.980 |
| Yes                                           | 41 (16.9)  | 24 (9.9)   | 17 (7.0)  |       |
| NA                                            | 167 (69.0) | 116 (48.0) | 51 (21.1) |       |
| <b>Metastasis (adrenals-liver-brain-bone)</b> |            |            |           |       |
| Genotyped                                     | 242 (100)  |            |           |       |
| No                                            | 15 (6.2)   | 10 (4.1)   | 5 (2.0)   | 0.759 |
| Yes                                           | 80 (33.1)  | 50 (21.0)  | 30 (12.4) |       |
| NA                                            | 147 (60.7) | 100 (41.3) | 47 (19.4) |       |
| <b>Survival (2 years)</b>                     |            |            |           |       |
| Genotyped                                     | 242 (100)  |            |           |       |
| Dead                                          | 105 (43.4) | 68 (28.1)  | 37 (15.3) | 0.632 |
| Alive                                         | 130 (53.7) | 87 (36.0)  | 43 (17.8) |       |
| NA                                            | 7 (2.9)    | 5 (2.1)    | 2 (0.8)   |       |
| <b>Survival (3 years)</b>                     |            |            |           |       |
| Genotyped                                     | 242 (100)  |            |           |       |
| Dead                                          | 136 (56.2) | 90 (37.2)  | 46 (19.0) | 0.967 |
| Alive                                         | 96 (39.7)  | 62 (25.6)  | 34 (14.1) |       |
| NA                                            | 10 (4.1)   | 8 (3.3)    | 2 (0.8)   |       |
| <b>Survival (5 years)</b>                     |            |            |           |       |
| Genotyped                                     | 242 (100)  |            |           |       |
| Dead                                          | 159 (65.7) | 108 (44.6) | 51 (21.1) | 0.513 |
| Alive                                         | 73 (30.2)  | 44 (18.2)  | 29 (12.0) |       |
| NA                                            | 10 (4.1)   | 8 (3.3)    | 2 (0.8)   |       |

**Supplementary Table S2.** Relationships between clinicopathological variables and *NF-kB2* rs12769316 genotypes. Abbreviations: NA, data not available or unknown.  
Abbreviations: NA, data not available or unknown.



| Clinicopathological characteristics | Patients<br>n (%) | Genotypes      |                | P-value      |
|-------------------------------------|-------------------|----------------|----------------|--------------|
|                                     |                   | AA             | AC             |              |
| <b>Total</b>                        | 272 (100)         |                |                |              |
| Genotyped                           | 261 (96.0)        | 239 (91.6)     | 22 (8.4)       | -            |
| NA                                  | 11 (4.0)          | -              | -              |              |
| <b>Age (years) Mean (range)</b>     | 65 (40-84)        |                |                |              |
| Genotyped                           | 261 (100)         |                |                |              |
| <65                                 | 101 (38.7)        | 97 (37.2)      | 4 (1.5)        | <b>0.038</b> |
| >=65                                | 159 (60.9)        | 141 (54.0)     | 18 (6.9)       |              |
| NA                                  | 1 (0.4)           | 1 (0.4)        | 0 (0)          |              |
| <b>Gender</b>                       |                   |                |                |              |
| Genotyped                           | 261 (100)         |                |                |              |
| Male                                | 238 (91.2)        | 217 (83.2)     | 21 (8.0)       | 0.461        |
| Female                              | 23 (8.8)          | 22 (8.4)       | 1 (0.4)        |              |
| <b>Smoking (pack-years)</b>         |                   |                |                |              |
| Genotyped                           | 261 (100)         |                |                |              |
| Cases (%)                           | 105 (39.7)        | 94 (36.0)      | 11 (4.2)       | 0.497        |
| Mean (range)                        | 86.3 (10-200)     | 88.41 (10-200) | 79.14 (30-135) |              |
| NA                                  | 156 (59.8)        | 145 (55.6)     | 11 (4.2)       |              |
| <b>Primary location</b>             |                   |                |                |              |
| Genotyped                           | 261 (100)         |                |                |              |
| Left lung                           | 114 (43.7)        | 106 (40.6)     | 8 (3.1)        | 0.299        |
| Right lung                          | 139 (53.3)        | 124 (47.5)     | 15 (5.8)       |              |
| NA                                  | 8 (3.0)           | 9 (3.4)        | 1 (0.3)        |              |
| <b>Histology</b>                    |                   |                |                |              |
| Genotyped                           | 261 (100)         |                |                |              |
| Squamous                            | 126 (48.3)        | 117 (45.0)     | 9 (3.4)        | 0.198        |
| Adenocarcinoma                      | 112 (42.9)        | 102 (39.1)     | 10 (3.8)       |              |
| Large carcinoma                     | 14 (5.4)          | 11 (4.2)       | 3 (1.2)        |              |
| NA                                  | 9 (3.4)           | 9 (3.4)        | 0 (0)          |              |

|                                |                  |                  |                   |       |
|--------------------------------|------------------|------------------|-------------------|-------|
| <b>Stage</b>                   |                  |                  |                   |       |
| Genotyped                      | 261 (100)        |                  |                   |       |
| I                              | 73 (28.0)        | 67 (25.7)        | 6 (2.3)           |       |
| II                             | 62 (23.8)        | 55 (21.1)        | 7 (2.7)           |       |
| III                            | 75 (28.7)        | 70 (26.8)        | 5 (1.9)           | 0.758 |
| IV                             | 38 (14.5)        | 35 (13.4)        | 3 (1.1)           |       |
| NA                             | 13 (5.0)         | 12 (4.6)         | 1 (0.4)           |       |
| <b>Grade</b>                   |                  |                  |                   |       |
| Genotyped                      | 261 (100)        |                  |                   |       |
| I                              | 7 (2.7)          | 7 (2.7)          | 0 (0.0)           |       |
| II                             | 101 (38.7)       | 91 (34.9)        | 10 (3.8)          | 0.615 |
| III                            | 103 (39.5)       | 95 (36.4)        | 8 (3.1)           |       |
| NA                             | 50 (19.2)        | 46 (17.6)        | 4 (1.6)           |       |
| <b>Maximum diameter (cm)</b>   |                  |                  |                   |       |
| Genotyped                      | 261 (100)        |                  |                   |       |
| Cases (%)                      | 217 (83.1)       | 200 (76.6)       | 17 (6.5)          |       |
| Mean (range)                   | 4.85 (0.70-21.0) | 4.82 (0.70-21.0) | 5.27 (1.90-11.00) | 0.372 |
| NA                             | 44 (16.9)        | 39 (15.0)        | 5 (1.9)           |       |
| <b>Lymph node infiltration</b> |                  |                  |                   |       |
| Genotyped                      | 261 (100)        |                  |                   |       |
| No                             | 107 (41.0)       | 101 (38.7)       | 6 (2.3)           |       |
| Yes                            | 92 (35.3)        | 81 (31.0)        | 11 (4.2)          | 0.110 |
| NA                             | 62 (23.7)        | 57 (21.8)        | 5 (1.9)           |       |
| <b>Metastasis (adrenals)</b>   |                  |                  |                   |       |
| Genotyped                      | 261 (100)        |                  |                   |       |
| No                             | 43 (16.5)        | 40 (15.3)        | 3 (1.2)           | 0.591 |
| Yes                            | 18 (6.9)         | 16 (6.1)         | 2 (0.8)           |       |
| NA                             | 200 (76.6)       | 183 (70.1)       | 17 (6.5)          |       |

|                                               |             |            |          |       |
|-----------------------------------------------|-------------|------------|----------|-------|
| <b>Metastasis (liver)</b>                     |             |            |          |       |
| Genotyped                                     | 261 (100)   |            |          |       |
| No                                            | 42 (16.1)   | 39 (14.9)  | 3 (1.2)  | 0.466 |
| Yes                                           | 24 (9.2)    | 21 (8.0)   | 3 (1.2)  |       |
| NA                                            | 195 (74.7)  | 179 (68.6) | 16 (6.1) |       |
|                                               |             |            |          |       |
| <b>Metastasis (brain)</b>                     |             |            |          |       |
| Genotyped                                     | 261 (100)   |            |          |       |
| No                                            | 41 (15.7)   | 37 (14.2)  | 4 (1.5)  | 0.493 |
| Yes                                           | 36 (13.8)   | 34 (13.0)  | 2 (0.8)  |       |
| NA                                            | 184 (70.5)) | 168 (64.4) | 16 (6.1) |       |
|                                               |             |            |          |       |
| <b>Metastasis (bone)</b>                      |             |            |          |       |
| Genotyped                                     | 261 (100)   |            |          |       |
| <b>No</b>                                     | 36 (13.8)   | 35 (13.4)  | 1 (0.4)  | 0.082 |
| <b>Yes</b>                                    | 43 (16.5)   | 37 (14.2)  | 6 (2.3)  |       |
| <b>NA</b>                                     | 182 (69.7)  | 167 (64.0) | 15 (5.7) |       |
|                                               |             |            |          |       |
| <b>Metastasis (adrenals-liver-brain-bone)</b> |             |            |          |       |
| Genotyped                                     | 261 (100)   |            |          |       |
| No                                            | 16 (6.2)    | 16 (6.1)   | 0 (0.0)  | 0.198 |
| Yes                                           | 84 (32.2)   | 76 (29.1)  | 8 (3.1)  |       |
| NA                                            | 161 (61.7)  | 147 (56.3) | 14 (5.4) |       |
|                                               |             |            |          |       |
| <b>Survival (2 years)</b>                     |             |            |          |       |
| Genotyped                                     | 261 (100)   |            |          |       |
| Dead                                          | 115 (44.1)  | 107 (41.0) | 8 (31.0) | 0.335 |
| Alive                                         | 139 (53.3)  | 125 (47.9) | 14 (5.4) |       |
| NA                                            | 7 (2.7)     | 7 (2.7)    | 0 (0)    |       |
|                                               |             |            |          |       |
| <b>Survival (3 years)</b>                     |             |            |          |       |
| Genotyped                                     | 261 (100)   |            |          |       |
| Dead                                          | 147 (56.3)  | 134 (51.3) | 13 (5.0) | 0.961 |
| Alive                                         | 104 (39.8)  | 96 (36.8)  | 8 (3.1)  |       |
| NA                                            | 10 (3.8)    | 9 (3.4)    | 1 (0.4)  |       |
|                                               |             |            |          |       |

| <b>Survival (5 years)</b> |            |            |          |       |
|---------------------------|------------|------------|----------|-------|
| Genotyped                 | 261 (100)  |            |          |       |
| Dead                      | 173 (66.3) | 159 (61.0) | 14 (5.3) | 0.815 |
| Alive                     | 78 (29.9)  | 71 (27.2)  | 7 (2.7)  |       |
| NA                        | 10 (3.8)   | 9 (3.4)    | 1 (0.4)  |       |

**Supplementary Table S3.** Relationships between clinicopathological variables and *NF- $\kappa$ B2* rs11574852 genotypes. Abbreviations: NA, data not available or unknown.

|                                                | <b><i>Retrospectively<br/>collected cases<br/><br/>(Group R)</i></b> | <b><i>Prospectively<br/>collected cases<br/><br/>(Group P)</i></b> | <b><i>Total cases<br/><br/>(Group PR)</i></b> |
|------------------------------------------------|----------------------------------------------------------------------|--------------------------------------------------------------------|-----------------------------------------------|
| <b>Clinicopathological<br/>characteristics</b> | <b><i>Cases<br/><br/>n (%)</i></b>                                   | <b><i>Cases<br/><br/>n (%)</i></b>                                 | <b><i>Cases<br/><br/>n (%)</i></b>            |
| <b>Total</b>                                   | <b><i>148 (100)</i></b>                                              | <b><i>124 (100)</i></b>                                            | <b><i>272 (100)</i></b>                       |
| <b>Age (years) Median (range)</b>              | 66 (40-84)                                                           | 67 (41-84)                                                         | 66 (40-84)                                    |
| <b>Gender</b>                                  |                                                                      |                                                                    |                                               |
| Total                                          | 148 (100)                                                            | 124 (100)                                                          | 272 (100)                                     |
| Male                                           | 137 (92.6)                                                           | 111 (89.5)                                                         | 248 (91.2)                                    |
| Female                                         | 11 (7.4)                                                             | 124 (10.5)                                                         | 24 (8.8)                                      |
| <b>Smoking (pack-years)</b>                    |                                                                      |                                                                    |                                               |
| Total                                          | 148 (100)                                                            | 124 (100)                                                          | 272 (100)                                     |
| Cases (%)                                      | 64 (43.2)                                                            | 44 (35.5)                                                          | 108 (39.7)                                    |
| Mean (range)                                   | 87.5 (20-165)                                                        | 84.55 (10-200)                                                     | 86.3 (10-200)                                 |
| NA                                             | 84 (56.8)                                                            | 80 (64.5)                                                          | 60 (60.3)                                     |
| <b>Primary location</b>                        |                                                                      |                                                                    |                                               |
| Total                                          | 148 (100)                                                            | 124 (100)                                                          | 272 (100)                                     |
| Left lung                                      | 66 (44.6)                                                            | 51 (41.1)                                                          | 117 (43.0)                                    |
| Right lung                                     | 82 (55.4)                                                            | 64 (51.6)                                                          | 146 (53.7)                                    |
| NA                                             | 0 (0.0)                                                              | 9 (7.3)                                                            | 9 (3.3)                                       |
| <b>Histology</b>                               |                                                                      |                                                                    |                                               |
| Total                                          | 148 (100)                                                            | 124 (100)                                                          | 272 (100)                                     |
| Squamous                                       | 85 (57.4)                                                            | 46 (37.1)                                                          | 131 (48.1)                                    |
| Adenocarcinoma                                 | 53 (35.8)                                                            | 64 (51.6)                                                          | 117 (43.0)                                    |
| Large carcinoma                                | 9 (6.1)                                                              | 6 (4.8)                                                            | 15 (0.06)                                     |
| NA                                             | 1 (0.0)                                                              | 8 (6.5)                                                            | 9 ((0.04)                                     |

|                                |                   |                 |                  |
|--------------------------------|-------------------|-----------------|------------------|
| <b>Stage</b>                   |                   |                 |                  |
| Total                          | 148 (100)         | 124 (100)       | 272 (100)        |
| I                              | 56 (37.8)         | 23 (18.6)       | 79 (29.0)        |
| II                             | 46 (31.1)         | 19 (15.3)       | 65 (23.9)        |
| III                            | 43 (29.1)         | 34 (27.4)       | 77 (28.3)        |
| IV                             | 2 (1.4)           | 36 (29.0)       | 38 (14.0)        |
| NA                             | 1 (0.6)           | 12 (9.7)        | 13 (4.8)         |
| <b>Grade</b>                   |                   |                 |                  |
| Total                          | 148 (100)         | 124 (100)       | 272 (100)        |
| I                              | 5 (3.4)           | 2 (1.6)         | 7 (2.6)          |
| II                             | 66 (44.6)         | 41 (33.1)       | 107 (39.3)       |
| III                            | 67 (45.3)         | 40 (32.2)       | 107 (39.3)       |
| NA                             | 10 (6.7)          | 41 (33.1)       | 51 (18.8)        |
| <b>Maximum diameter (cm)</b>   |                   |                 |                  |
| Total                          | 148 (100)         | 124 (100)       | 272 (100)        |
| Cases (%)                      | 144 (97.3)        | 83 (66.9)       | 227 (83.5)       |
| Mean (range)                   | 5.15 (0.70-21.0)) | 4.35 (1.0-10.0) | 4.85 (0.70-21.0) |
| NA                             | 4 (2.7)           | 41 (33.1)       | 45 (16.5)        |
| <b>Lymph node infiltration</b> |                   |                 |                  |
| Total                          | 148 (100)         | 124 (100)       | 272 (100)        |
| No                             | 77 (52.0)         | 37 (29.8)       | 114 (41.9)       |
| Yes                            | 65 (43.9)         | 31 (25.0)       | 96 (35.3)        |
| NA                             | 6 (4.1)           | 56 (45.2)       | 62 (22.8)        |
| <b>Metastasis (adrenals)</b>   |                   |                 |                  |
| Total                          | 148 (100)         | 124 (100)       | 272 (100)        |
| No                             | 30 (20.3)         | 15 (12.1)       | 45 (16.5)        |
| Yes                            | 7 (4.7)           | 12 (9.7)        | 19 (7.0)         |
| NA                             | 111 (75.0)        | 97 (78.2)       | 208 (76.5))      |
| <b>Metastasis (liver)</b>      |                   |                 |                  |
| Total                          | 148 (100)         | 124 (100)       | 272 (100)        |
| No                             | 31 (20.9)         | 12 (9.7)        | 43 (15.8)        |
| Yes                            | 6 (4.1)           | 17 (13.7)       | 23 (8.5)         |
| NA                             | 111 (75.0)        | 95 (76.6)       | 206 (75.70)      |

|                                               |            |           |            |
|-----------------------------------------------|------------|-----------|------------|
| <b>Metastasis (brain)</b>                     |            |           |            |
| Total                                         | 148 (100)  | 124 (100) | 272 (100)  |
| No                                            | 31 (20.9)  | 12 (9.7)  | 43 (15.8)  |
| Yes                                           | 9 (6.1)    | 27 (21.8) | 36 (13.2)  |
| NA                                            | 108 (73.0) | 85 (68.5) | 193 (71.0) |
| <b>Metastasis (bone)</b>                      |            |           |            |
| <b>Total</b>                                  | 148 (100)  | 124 (100) | 272 (100)  |
| <b>No</b>                                     | 24 (16.20) | 14 (11.3) | 38 (14.0)  |
| <b>Yes</b>                                    | 16 (10.8)  | 27 (21.8) | 43 (15.8)  |
| <b>NA</b>                                     | 108 (73.0) | 83 (66.9) | 191 (70.2) |
| <b>Metastasis (adrenals-liver-brain-bone)</b> |            |           |            |
| Total                                         | 148 (100)  | 124 (100) | 272 (100)  |
| No                                            | 10 (6.8)   | 6 (4.8)   | 16 (5.9)   |
| Yes                                           | 35 (23.6)  | 50 (40.3) | 85 (31.2)  |
| NA                                            | 103 (69.6) | 68 (54.8) | 171 (62.9) |
| <b>Survival (2 years)</b>                     |            |           |            |
| Total                                         | 148 (100)  | 124 (100) | 272 (100)  |
| Dead                                          | 54 (36.5)  | 65 (52.4) | 119 (43.8) |
| Alive                                         | 92 (62.2)  | 54 (43.5) | 146 (53.7) |
| NA                                            | 2 (1.3)    | 5 (4.1)   | 7 (2.5)    |
| <b>Survival (3 years)</b>                     |            |           |            |
| Total                                         | 148 (100)  | 124 (100) | 272 (100)  |
| Dead                                          | 73 (49.3)  | 78 (62.9) | 151 (55.5) |
| Alive                                         | 70 (47.3)  | 40 (32.3) | 110 (40.4) |
| NA                                            | 5 (3.4)    | 6 (4.8)   | 11 (4.1)   |
| <b>Survival (5 years)</b>                     |            |           |            |
| Total                                         | 148 (100)  | 124 (100) | 272 (100)  |
| Dead                                          | 86 (58.1)  | 93 (75.0) | 179 (65.8) |
| Alive                                         | 57 (38.5)  | 25 (20.2) | 82 (30.1)  |
| NA                                            | 5 (3.4)    | 6 (4.8)   | 11 (4.1)   |

| <b>Relapse</b> |            |            |            |
|----------------|------------|------------|------------|
| Total          | 148 (100)  | 124 (100)  | 272 (100)  |
| No             | 15 (10.1)  | 1 (0.8)    | 16 (5.9)   |
| Yes            | 22 (14.9)  | 12 (9.7)   | 34 (12.5)  |
| NA             | 111 (75.0) | 111 (89.5) | 222 (81.6) |

**Supplementary Table S4.** Clinicopathological characteristics of patients of this study. NA: not available or no further specifically categorized (e.g NSCLC vs squamous histology). Abbreviations: NA, data not available or unknown.



| <b>Groups (persons)</b>      | <b>Patients group (272)</b> | <b>Controls group (279)</b> | <b>P value</b> |
|------------------------------|-----------------------------|-----------------------------|----------------|
| Age (years)                  | 64.68 (40-84)               | 64.45 (30-95)               | 0.815          |
| Gender no<br>(males/females) | 248/24                      | 245/34                      | 0.214          |

**Supplementary Table S5.** Demographic characteristics of the controls and patients groups.

| <i>NF-κB2</i><br>gene<br>location | Rs number  | Base<br>change | Genomic<br>position<br>(forward<br>strand) | Genotyping<br>success rate | Minor allele frequency |                      |                      |
|-----------------------------------|------------|----------------|--------------------------------------------|----------------------------|------------------------|----------------------|----------------------|
|                                   |            |                |                                            |                            | Controls               | 1000genomes<br>(CEU) | 1000genomes<br>(TSI) |
| 5' flanking<br>region             | rs12769316 | G > A          | 10:102392994                               | 95.06                      | 0.153 (A)              | 0.187 (A)            | 0.159 (A)            |
| Intron 8                          | rs7897947  | T > G          | 10:102397954                               | 99.27                      | 0.337 (G)              | 0.192 (G)            | 0.206 (G)            |
| Intron 20                         | rs11574852 | A > C          | 10:102401718                               | 98.53                      | 0.042 (C)              | 0.051 (C)            | 0.065 (C)            |

**Supplementary Table S6.** SNPs information. 1000 Genomes;1000 Genomes Project, CEU; Utah Residents (CEPH) with Northern and Western European Ancestry, TSI; Toscani in Italia

|                                            | <b>Total cases</b>                  |
|--------------------------------------------|-------------------------------------|
| <b>Clinicopathological characteristics</b> | <b>Cases</b><br><b><i>n</i> (%)</b> |
| <b>Total</b>                               | 151 (100)                           |
| <b>Age (years) Median (range)</b>          | 66 (40-84)                          |
| <b>Gender</b>                              |                                     |
| Total                                      | 151 (100)                           |
| Male                                       | 139 (92.1)                          |
| Female                                     | 12 (7.9)                            |
| <b>Smoking (pack-years)</b>                |                                     |
| Total                                      | 151 (100)                           |
| Cases (%)                                  | 59 (39.1)                           |
| Mean (range)                               | 87.63 (20-165)                      |
| NA                                         | 92 (60.9)                           |
| <b>Primary location</b>                    |                                     |
| Total                                      | 151 (100)                           |
| Left lung                                  | 66 (43.7)                           |
| Right lung                                 | 85 (56.3)                           |
| NA                                         | -                                   |
| <b>Histology</b>                           |                                     |
| Total                                      | 151 (100)                           |
| Squamous                                   | 86 (57.0)                           |
| Adenocarcinoma                             | 54 (35.8)                           |
| Large carcinoma                            | 10 (6.6)                            |
| NA                                         | 1 (0.6)                             |
| <b>Stage</b>                               |                                     |
| Total                                      | 151 (100)                           |
| I                                          | 59 (39.1)                           |
| II                                         | 44 (29.1)                           |
| III                                        | 45 (29.8)                           |
| IV                                         | 2 (1.3)                             |
| NA                                         | 1 (0.7)                             |

|                                |                   |
|--------------------------------|-------------------|
| <b>Grade</b>                   |                   |
| Total                          | 151 (100)         |
| I                              | 4 (2.6)           |
| II                             | 70 (46.4)         |
| III                            | 67 (44.4)         |
| NA                             | 10 (6.6)          |
| <b>Maximum diameter (cm)</b>   |                   |
| Total                          | 151 (100)         |
| Cases (%)                      | 147 (97.4)        |
| Mean (range)                   | 5.09 (0.70-21.00) |
| NA                             | 4 (2.6)           |
| <b>Lymph node infiltration</b> |                   |
| Total                          | 151 (100)         |
| No                             | 79 (52.3)         |
| Yes                            | 65 (43.0)         |
| NA                             | 7 (4.6)           |
| <b>Metastasis (adrenals)</b>   |                   |
| Total                          | 151 (100)         |
| No                             | 29 (19.2)         |
| Yes                            | 7 (4.6)           |
| NA                             | 115 (76.2)        |
| <b>Metastasis (liver)</b>      |                   |
| Total                          | 151 (100)         |
| No                             | 30 (19.9)         |
| Yes                            | 5 (3.3)           |
| NA                             | 116 (76.8)        |
| <b>Metastasis (brain)</b>      |                   |
| Total                          | 151 (100)         |
| No                             | 30 (19.70)        |
| Yes                            | 9 (6.0)           |
| NA                             | 112 (74.2)        |

|                                               |            |
|-----------------------------------------------|------------|
| <b>Metastasis (bone)</b>                      |            |
| Total                                         | 151 (100)  |
| No                                            | 23 (15.2)  |
| Yes                                           | 17 (11.3)  |
| NA                                            | 111 (73.5) |
| <b>Metastasis (adrenals-liver-brain-bone)</b> |            |
| Total                                         | 151 (100)  |
| No                                            | 9 (6.0)    |
| Yes                                           | 36 (23.8)  |
| NA                                            | 106 (70.2) |
| <b>Survival (2 years)</b>                     |            |
| Total                                         | 151 (100)  |
| Dead                                          | 56 (37.1)  |
| Alive                                         | 93 (61.6)  |
| NA                                            | 2 (1.3)    |
| <b>Survival (3 years)</b>                     |            |
| Total                                         | 151 (100)  |
| Dead                                          | 75 (49.7)  |
| Alive                                         | 71 (47.0)  |
| NA                                            | 5 (3.3)    |
| <b>Survival (5 years)</b>                     |            |
| Total                                         | 151 (100)  |
| Dead                                          | 91 (60.3)  |
| Alive                                         | 55 (36.4)  |
| NA                                            | 5 (3.3)    |
| <b>Relapse</b>                                |            |
| Total                                         | 151 (100)  |
| No                                            | 14 (9.3)   |
| Yes                                           | 23 (15.2)  |
| NA                                            | 114 (75.5) |

**Supplementary Table S7.** Clinicopathological characteristics and survival data of NSCLC patients studied by immunohistochemistry. Abbreviations: NA, data not available or unknown.
